# Supplementary material
Source: Springer Nature journal article supplement (https://www.springermedizin.de/resource/supplementary/12890_2011_256_MOESM3_ESM.pdf/9504808)

**A**

Negative control

Non-smoker

Smoker

COPD

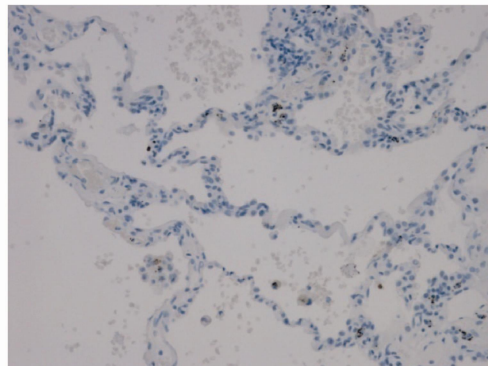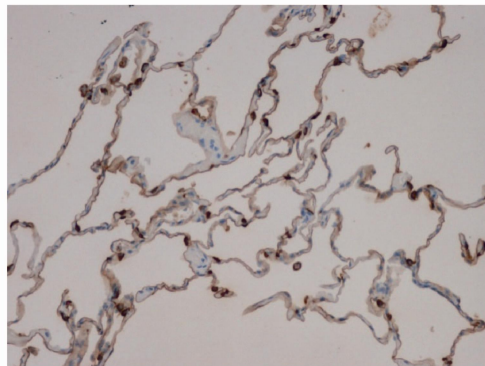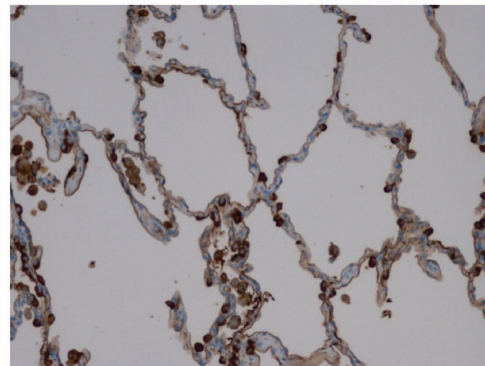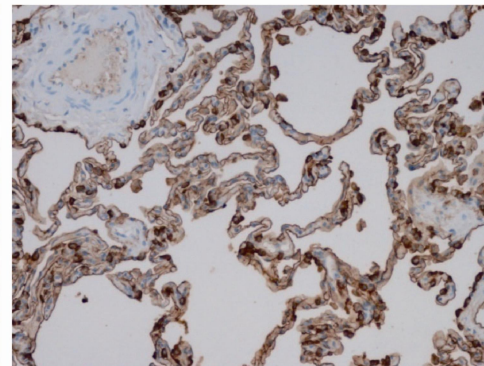**B**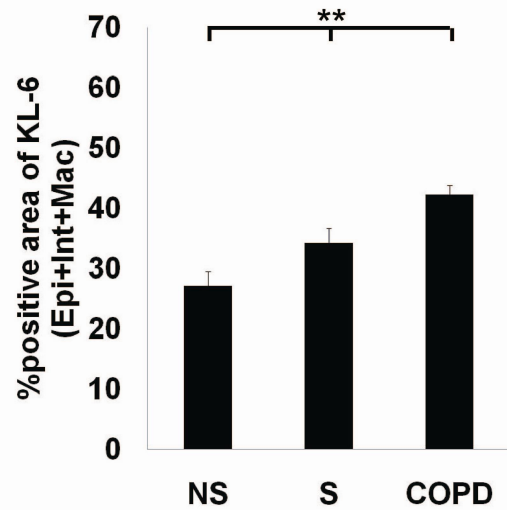**C**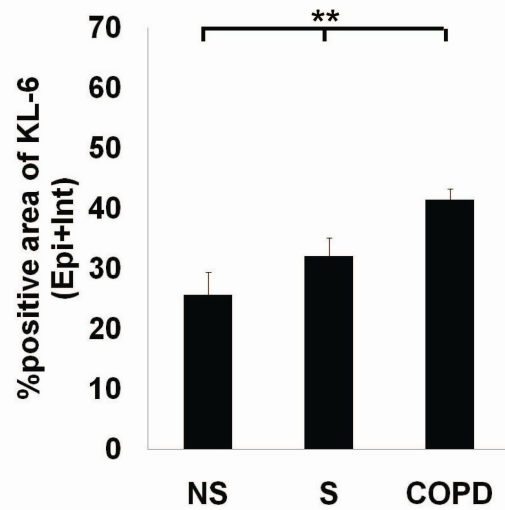**D**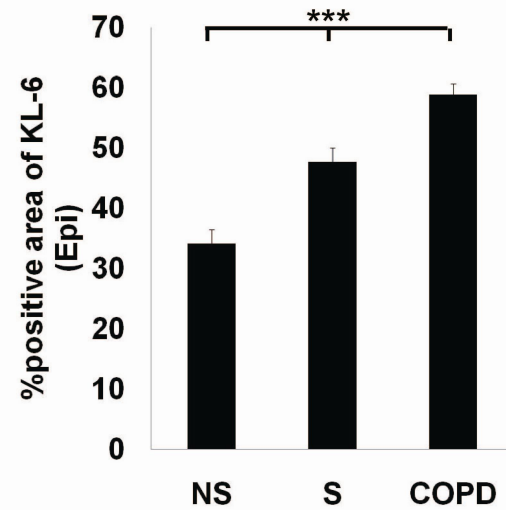

Supplement: MOESM3 [file 9504808]
